# Genetic Response to Climatic Change: Insights from Ancient DNA and Phylochronology

Elizabeth A. Hadly<sup>1\*</sup>, Uma Ramakrishnan<sup>1</sup>, Yvonne L. Chan<sup>1</sup>, Marcel van Tuinen<sup>1</sup>, Kim O'Keefe<sup>1</sup>, Paula A. Spaeth<sup>1</sup>, Chris J. Conroy<sup>2</sup>

**1** Department of Biological Sciences, Stanford University, Stanford, California, United States of America, **2** Museum of Vertebrate Zoology, University of California, Berkeley, Berkeley, California, United States of America

**Understanding how climatic change impacts biological diversity is critical to conservation. Yet despite demonstrated effects of climatic perturbation on geographic ranges and population persistence, surprisingly little is known of the genetic response of species. Even less is known over ecologically long time scales pertinent to understanding the interplay between microevolution and environmental change. Here, we present a study of population variation by directly tracking genetic change and population size in two geographically widespread mammal species (*Microtus montanus* and *Thomomys talpoides*) during late-Holocene climatic change. We use ancient DNA to compare two independent estimates of population size (ecological and genetic) and corroborate our results with gene diversity and serial coalescent simulations. Our data and analyses indicate that, with population size decreasing at times of climatic change, some species will exhibit declining gene diversity as expected from simple population genetic models, whereas others will not. While our results could be consistent with selection, independent lines of evidence implicate differences in gene flow, which depends on the life history strategy of species.**

Citation: Hadly EA, Ramakrishnan U, Chan YL, van Tuinen M, O'Keefe K, et al. (2004) Genetic response to climatic change: Insights from ancient DNA and phylochronology. PLoS Biol 2(10): e290.

## Introduction

Phylogeography has advanced our understanding of the spatial distribution of genetic diversity within and between species (Avice 2000). However, empirical evidence of temporal change in genetic diversity in a single locality over time has not yet been placed in a population genetic or phylogeographic framework over ecologically long periods of time. In this paper we attempt to determine variation in genetic diversity experienced by populations of two mammalian species in situ and to place that diversity in the context of a changing environment through time. We view this approach as “phylochronology,” or the study of populations in space and time using phylogenetic and population genetic methods. Similar studies have not used such a long temporal record (Pergams et al. 2003), have not considered gene flow (Lambert et al. 2002; Pergams et al. 2003), or have used a spatially averaged sample as a proxy for a single locality (Leonard et al. 2000).

Our study takes advantage of a continuous, well-sampled mammalian fossil sequence spanning the last 3,000 years (Lamar Cave, Yellowstone National Park, Wyoming, United States). Lamar Cave has an extraordinarily complete representation of the local species in the vicinity, with over 10,000 identified mammalian specimens representing over 80% of the mammal species in the local habitat (Hadly 1999). Late-Holocene climatic change, including the Medieval Warm Period (1,150 to 650 years before present [ybp]) and Little Ice Age (650 to 50 ybp) (Soon and Baliunas 2003), affected the local abundances of common small mammals in a manner consistent with their habitat preferences (Hadly 1996).

We focus on two mesic habitat specialists, *Microtus montanus*

(montane vole) and *Thomomys talpoides* (northern pocket gopher), species that presently are widespread in mountain habitats of western North America. Due to their preferences for wetter habitats, both responded demographically by increasing in relative abundance during wetter climates and declining during warmer climates. *M. montanus* showed an increase in abundance relative to other common rodents during periods of wet, cool climate in Yellowstone (Hadly 1996). A 40% decline in *M. montanus* abundance occurred from 2,525 ybp to about 470 ybp during the Medieval Warm Period. Because *T. talpoides* also demonstrates a preference for mesic montane conditions, shifts in their relative abundance mimic the response seen in *Microtus*, decreasing by 50% between 2,525 and 470 ybp. In addition, *T. talpoides* showed a significant reduction in body size during this time (Hadly 1997). These data highlight the influence of climatic change on the population dynamics and phenotypic response of these species, especially during warming events.

Received January 29, 2004; Accepted July 5, 2004; Published September 7, 2004  
DOI: 10.1371/journal.pbio.0020290

Copyright: © 2004 Hadly et al. This is an open-access article distributed under the terms of the Creative Commons Attribution License, which permits unrestricted use, distribution, and reproduction in any medium, provided the original work is properly cited.

Abbreviations: aDNA, ancient DNA; bp, base pair; ha, hectare; mtDNA, mitochondrial DNA;  $N_{e\_ecol}$ , estimate of effective size derived from ecological data;  $N_{e\_gen}$ , estimate of effective size derived from genetic data;  $N_{e\_mm\_ecol}$ ,  $N_{e\_ecol}$  for *M. montanus*;  $N_{e\_mm\_gen}$ ,  $N_{e\_gen}$  for *M. montanus*;  $N_{e\_tt\_ecol}$ ,  $N_{e\_ecol}$  for *T. talpoides*;  $N_{e\_tt\_gen}$ ,  $N_{e\_gen}$  for *T. talpoides*; ybp, years before present

Academic Editor: Craig Moritz, University of California, Berkeley

\*To whom correspondence should be addressed. E-mail: hadly@stanford.edu

☯ These authors contributed equally to this work.

Although the population responses of *T. talpoides* and *M. montanus* are similar, the ways in which they respond to climatic change at the genetic level are predicted to diverge because of differences in dispersal ability and population substructure. Advancement of ancient DNA (aDNA) techniques allows us to investigate directly the impacts of these environmental perturbations on neutral genetic diversity concurrent with these species population responses. We obtained ancient and modern mitochondrial DNA sequences from *M. montanus* and used previously published data for *T. talpoides*. Although these two species are broadly similar in body size (*M. montanus*, 50–100 g; *T. talpoides*, 75–150 g) and are principally herbivorous, they differ in their natural history. *T. talpoides* is characterized by low population densities (1–62 gophers/hectare [ha]), a fossorial mode of life, maximum dispersal distances of a few hundred meters, and fiercely territorial behavior (Verts and Carraway 1999). Populations of *T. talpoides* from Lamar Cave exhibit very little genetic variation through time but considerable genetic differences between present localities (Hadly et al. 1998). This spatio-temporal pattern suggests that late-Holocene gene flow did not influence modern genetic variation of *T. talpoides* within localities over relatively short time scales (hundreds to thousands of years) despite the absence of obvious migration barriers.

*M. montanus* achieves higher average population densities (60–186 voles/ha) (Sullivan et al. 2003) than *T. talpoides*. In addition, genetic studies of closely related species and other arvicoline species (*Microtus pennsylvanicus*, *Microtus longicaudus*, and *Microtus agrestis*) have found little evidence for population subdivision over the scale of hundreds of kilometers (Plante et al. 1989; Conroy and Cook 2000; Bjørnstad and Grenfell 2001; Jaarola and Searle 2002), as expected from the ability and proclivity of voles to disperse hundreds to thousands of meters, resulting in migration between populations on generational time scales (Jenkins 1948; Lidicker 1985). Such demography, however, implies that historical gene flow may be difficult to detect in *M. montanus* if only genetic data from the modern animals are used. This is contrary to the pattern expected in *T. talpoides* because this species has high genetic differentiation between extant populations, and past movement between such populations would be relatively easy to ascertain by the historic presence of unique, divergent haplotypes (Hadly et al. 1998).

The primary advantage of a phylogenetic approach as opposed to a single time slice for understanding mammalian response is the ability to reveal changes in genetic variation through time. This is in contrast to modern genetic studies that seek to reconstruct demographic history based on inferences from past climate or geologic records (e.g., Storz and Beaumont 2002; Lessa et al. 2003). Our study separates demographic and genetic response explicitly, allowing us to understand the microevolutionary forces responsible for the differences in species response over a time scale relevant to evolution within species. This approach is particularly powerful when coupled with environmental data so that perturbations may be linked to organismal response.

In order to reveal these microevolutionary forces from our serial ancient data, it was necessary to explore the influence of sampling from the fossil record and to determine how variation in stochastic evolutionary forces (gene flow, drift, and mutation rate) might influence the record of gene

diversity over time. Thus, we combined four methods of estimating population size, determining statistical significance, and assessing gene diversity through time. (1) We derived independent ecological estimates of population size through time from abundances of *M. montanus* and *T. talpoides* fossil specimens and modern population densities. (2) We calculated gene diversity over this 3,000-year period to determine the impact of environmental perturbations on genetic effective population size and gene diversity in *M. montanus* and *T. talpoides*. Unlike previous aDNA work (Consuegra et al. 2002; Hofreiter et al. 2002; Lambert et al. 2002; Orlando et al. 2002; Paxinos et al. 2002), we used mitochondrial DNA sequences for samples taken through time from a single locality. (3) While there have been advances in the use of nuclear markers for ancient genetic analyses, we also confine our analyses to more easily derived mitochondrial DNA (mtDNA) data, thus limiting our analyses to a single locus, usually seen as a neutral marker within mammalian species (Moritz et al. 1987). Our approach also constrains us to the fossil sample sizes from this locality, which are extremely large for ancient DNA studies, but limited relative to population genetic studies. Thus, we assessed the statistical power of a single locus for our empirical data using a neutral population model. (4) We used a neutral population model and serial coalescent simulations to determine whether our observed genetic data reflect our ecological estimates of population size and to evaluate statistical significance in changes of gene diversity through time.

Despite similar population-level responses to climatic change of the late Holocene, we expected differences in gene diversity change for the two species. For *T. talpoides*, we predicted that changes in genetic variation through time would be dominated by drift, as suggested by the modern life history characteristics of small effective population size, low dispersal, and high amounts of population substructure. Therefore, as the ecological effective population size of *T. talpoides* declined with warmer climates, we expected genetic variation to decline. For *M. montanus*, we predicted that changes in genetic variation through time may be influenced more by migration, as suggested by large effective population sizes, high rates of dispersal, and low amounts of population substructure. As a result, past declines in ecological estimates of population size of *M. montanus* would not necessarily have resulted in a decrease in genetic variation.

## Results

### Fossil Abundance

Our assessment of population response to climatic change (Figure 1) depends on reconstruction of population size. Fossil relative abundances give a hint of the census size through time while genetic data (gene diversity, Figure 1) should yield independent assessments of the effective population size. The relationship between these measures varies, although most studies suggest that the estimate of effective size derived from ecological data is higher than that derived from genetic data ( $N_{e\_ecol} \gg N_{e\_gen}$ ) (Frankham 1996; Kalinowski and Waples 2002). However, we can convert census size estimates at any point in time into effective size estimates and vice versa. This allows us to compare explicitly ecological and genetic measures of population size. Figure 2

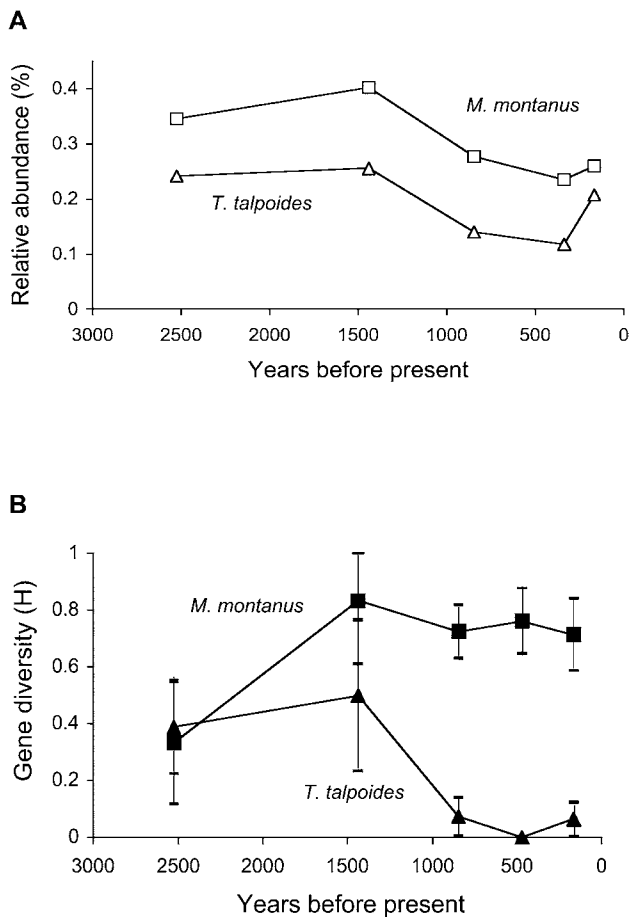

**Figure 1.** Proportional Population Size and Gene Diversity of *M. montanus* and *T. talpoides*

(A) Proportional population size (relative abundance) of *M. montanus* and *T. talpoides* ( $n = 8,589$  fossils) by years before present.

(B) Gene diversity ( $H$ ) of *M. montanus* and *T. talpoides* by years before present; 95% confidence intervals are shown. Squares indicate *M. montanus*; triangles indicate *T. talpoides*.

DOI: 10.1371/journal.pbio.0020290.g001

shows  $N_{e\_ecol}$  estimates based on low-, high-, and moderate-density estimates for *T. talpoides* (Figure 2A) and *M. montanus* (Figure 2B). For *M. montanus* they range from 218,652 to 436,981 for low-density estimates and from 677,825 to 1,354,650 for high-density estimates. For *T. talpoides* low-density estimates range from 2,219 to 5,015 and high-density estimates range from 4,586 to 10,488 individuals in the 7-km radius around Lamar Cave.

#### Genetic Data: *M. montanus*

The genetic evidence we have assembled from *M. montanus* suggests that the sequences we obtained for this study are target mtDNA. Of the 312 bp we sequenced for *M. montanus*, 96.5% of all the mutations were third-position codon changes, with first- and second-position mutations accounting for 3.5% and 0%, respectively. These ratios of variation are concordant with expectations for within-species variation and small overall sequence divergences (Yang and Yoder 1999). Nucleotide base composition is similar to that of other *Microtus* species (Conroy and Cook 2000; Jaarola and Searle 2002), with an excess of adenine (31.2%) and a deficit of guanine (15.7%) ( $\chi^2$ ;  $\alpha = 0.71$ ). Most of the mutations are

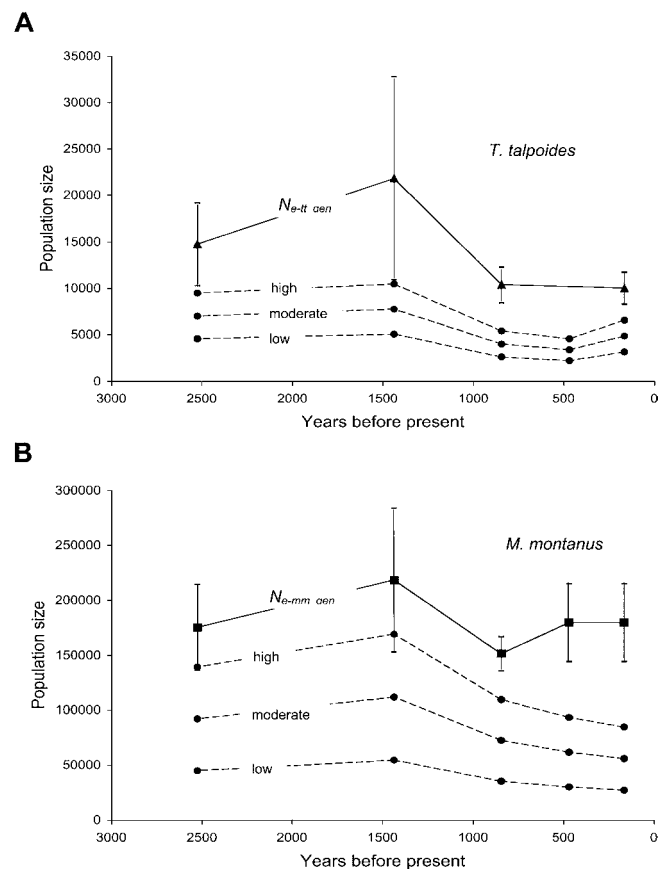

**Figure 2.** Estimates of  $N_{e\_gen}$  and  $N_{e\_ecol}$

(A) *T. talpoides* and (B) *M. montanus* through time. Circles and dashed lines show  $N_{e\_ecol}$  estimates based on low-, high-, and moderate-density estimates.  $N_{e\_gen}$  estimates ([A] triangles and [B] rectangles) are based on  $\theta_S$  estimates from Arlequin. Standard errors for  $N_{e\_gen}$  are represented.

DOI: 10.1371/journal.pbio.0020290.g002

synonymous (97.7%); the transition-to-transversion ratio of the entire data set was 4.1 to 1, which is consistent with expectations for mammalian cytochrome *b* and evolution in other *Microtus* species (Conroy and Cook 2000; Jaarola and Searle 2002). Fossil and modern transition-to-transversion ratios are similar (3.1 and 4.2, respectively). All *M. montanus* sequences are reciprocally monophyletic (including *M. pennsylvanicus* as outgroup taxon) and translated successfully. Together with the frequency distribution of our pairwise differences, the prevalence of silent and third-position codon changes, and the standard of obtaining both forward and reverse fragments of overlapping sequence regions, these data permit us to conclude that the genetic diversity we have sampled represents authentic mitochondrial population variation and is unlikely to be from nuclear copies or pseudogenes.

A total of 282 experiments included 47 fossil extractions and 1,644 PCRs. Eighty-eight percent of our aDNA specimens yielded readable sequence data, with no relationship found between success rate and age of the specimen ( $R^2 = 0.004$ , not significant). All but one (out of 121) of the extraction controls were negative. When sequenced, this extraction blank BLASTed similar to *Montanus townsendii*, a taxon we had never worked on in the facility; this sequence has not since

been amplified in the lab, and that extraction was not used further. Out of 87 successfully amplified samples and one sequence obtained from GenBank (AF119280), we identified 17 haplotypes within four haplogroups (A–D) of *M. montanus* (Figure 3A). The distribution of haplotypes within haplogroups suggests that our groups are defined appropriately. Each haplogroup was defined by at least 3% sequence divergence ( $\geq 10$  bp) from other haplogroups in the 312-bp cytochrome *b* fragment. The majority of individuals (98.8%) fall within haplogroups A and D, with 84% of the samples within one substitution of the locally ancestral haplotype A (Figure 3A).

The maximum uncorrected sequence divergence for our complete spatial and temporal data set was 4.5%, demonstrated between haplogroups A and B. Given that the highest average rodent divergence rate for cytochrome *b* is 6% to 10% per million years (Irwin et al. 1991), these haplogroups have been evolving separately for at least 450,000 years. A similar

age (422,000 years) is found when using a rate of 2.3% per million years for third-position transversions (Conroy and Cook 1999). The maximum uncorrected sequence divergence of *M. montanus* from throughout the Lamar Cave temporal sequence was 4.2%. The maximum sequence divergence of 19 modern individuals from populations of this species within Yellowstone National Park and surroundings was 3.8%.

#### Genetic Data: *T. talpoides*

Protocols for *T. talpoides* are found in Hadly et al. (1998). A haplotype network of this species shows three haplogroups and a total of eight haplotypes from 76 specimens (Figure 3B). For *T. talpoides*, 98.0% of all the mutations were third-position codon changes, with first- and second-position mutations accounting for 0% and 2.0%, respectively. Nucleotide base composition shows an excess of thymine (34.7%) and a deficit of guanine (11.4%). All mutations were synonymous; the transition-to-transversion ratio of the entire data set was 4.0 to 1.

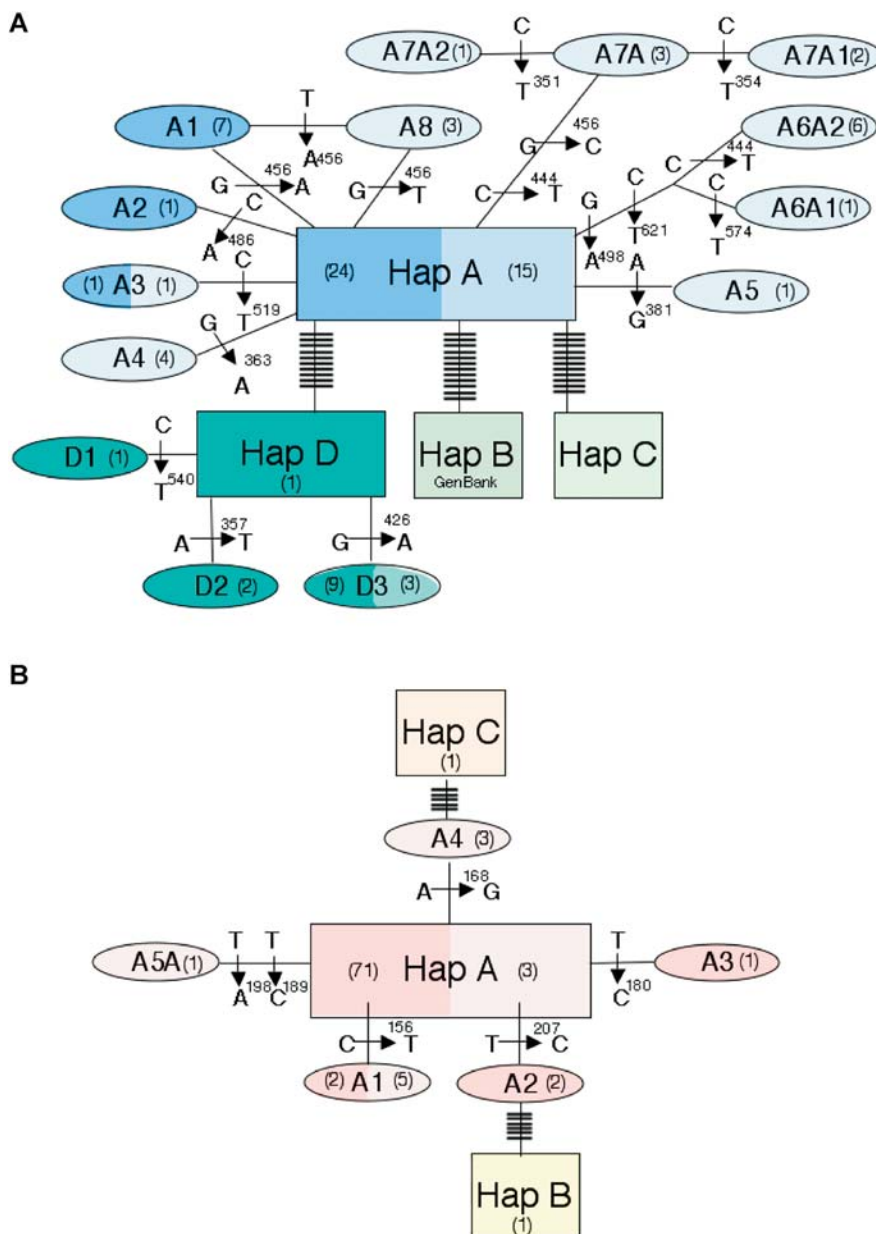

**Figure 3.** Haplotype Networks for *M. montanus* and *T. talpoides*

Haplotype networks (Clement et al. 2000) for (A) *M. montanus* and (B) *T. talpoides* from Lamar Cave fossils and from modern specimens collected within a 400-km radius of Lamar Cave. Haplogroups for both species are indicated as A–D. Each haplogroup within a species is defined by at least 3% sequence divergence within the cytochrome *b* fragment. *M. montanus* haplogroup B is taken from GenBank. Haplogroup C is a sample from outside our 400-km radius (NK5897, Mono County, California; Museum of Southwestern Biology #53376). Light shading shows modern samples; dark shading shows fossil samples; bars indicate substitutions; cytochrome *b* sequence positions are indicated by number above base designation. Numbers within parentheses indicate sample sizes for each haplotype.

DOI: 10.1371/journal.pbio.0020290.g003

## Gene Diversity through Time

Estimates of gene diversity, nucleotide diversity, and number of segregating sites differed between *M. montanus* and *T. talpoides* (Table 1). The estimates for *M. montanus* were higher than those for *T. talpoides*, as predicted by life history traits including higher ecological effective population size and higher dispersal between populations.

Our raw data on these species show similar relative abundance patterns but disparate trends in gene diversity (see Figure 1). These patterns cannot be linked directly to relative abundance because gene diversity estimates depend on true population size as well as sampling. We investigate how both of these parameters impact the observed trend in the following sections.

## Comparing Ecological and Genetic Estimates of Effective Size

Ecological estimates of population size for *T. talpoides* ( $N_{e-tt\_ecol}$ ) exhibit the same trend as the genetic estimates ( $N_{e-tt\_gen}$ ), namely a population size decline of >50% after 1,500 ybp (see Figure 2A). For *T. talpoides*,  $N_{e-tt\_gen}$  is consistently higher than  $N_{e-tt\_ecol}$ . When compared to those for *M. montanus* (see Figure 2B), the estimates of total ecological and genetic effective population size are much lower. Additionally, unlike with *M. montanus*, the ecological and genetic effective sizes follow similar trends through the entire time period sampled, indicating that *T. talpoides* is acting as a closed population.

For *M. montanus*, the estimates of effective size derived from the ecological data ( $N_{e-mm\_ecol}$ ) are lower than those derived from genetic data ( $N_{e-mm\_gen}$ ) for all time points (see Figure 2B). While the estimates are not expected to be identical, comparison of their trends is instructive. Both genetic and

ecological estimates follow similar trends between 2,525 and 845 ybp, after which the two estimates follow opposite trajectories. While the ecological size decreases by 50%, the genetic estimates show an initial decline of 30%, followed by an increase in population size equivalent to the pre-1,438-ybp level. This demonstrates that although the population is not recovering ecologically, it does recover genetically from population decline between 1,438 and 845 ybp.

## Effects of Sampling

For *M. montanus*, our observed data were within the 95% confidence intervals for both sets of simulations ( $n_{sample}$  and  $n = 100$ ; mutation rate = 4% per million years; moderate density values used to calculate abundance) for all time points except for 2,525 ybp, where observed gene diversity was significantly lower than could have been calculated given our sample size (Figure 4). Since the observed gene diversity is lower than expected, we repeated simulations for five additional combinations of mutation rate and abundance (low mutation rate, high abundance; low mutation rate, moderate abundance; low mutation rate, low abundance; moderate mutation rate, low abundance; high mutation rate, low abundance). Results revealed that the observed gene diversity at 2,525 ybp was within the lower fifth percentile of the predicted distribution for two of the five combinations (when both mutation rate and abundance were low and for low mutation rate, moderate abundance). The overlap between the 95% confidence intervals for both sets of simulations suggests that sampling bias does not significantly impact the observed patterns of gene diversity except at 1,438 ybp ( $n = 4$ ), suggesting that we do not have sufficient power to detect processes at this time period.

Although the gene diversity for *T. talpoides* is not different

**Table 1.** Summary Statistics, Sample Sizes, Sequence Length, and Number of Haplotypes for the Ancient DNA Samples for *T. talpoides* and *M. montanus* from Lamar Cave, Wyoming

| <i>T. talpoides</i> (Sequence Length, 64 bp) |                |               |               |               |               |
|----------------------------------------------|----------------|---------------|---------------|---------------|---------------|
| Time (mid-point of interval)                 | 166 ybp        | 470 ybp       | 845 ybp       | 1,438 ybp     | 2,525 ybp     |
| <i>N</i>                                     | 34             | 5             | 27            | 4             | 9             |
| No. of haplotypes                            | 2              | 1             | 2             | 2             | 2             |
| No. of polymorphic sites                     | 1              | 0             | 1             | 1             | 1             |
| Gene diversity                               | 0.0645 ± 0.059 | 0             | 0.074 ± 0.067 | 0.500 ± 0.265 | 0.389 ± 0.164 |
| Mean no. of pairwise differences             | 0.0645         | 0             | 0.074 ± 0.150 | 0.500 ± 0.519 | 0.389 ± 0.399 |
| Nucleotide diversity                         | 0.001 ± 0.002  | 0             | 0.001 ± 0.003 | 0.008 ± 0.01  | 0.006 ± 0.007 |
| <i>M. montanus</i> (Sequence Length, 312 bp) |                |               |               |               |               |
| Time (mid-point of interval)                 | 166 ybp        | 470 ybp       | 845 ybp       | 1,438 ybp     | 2,525 ybp     |
| <i>N</i>                                     | 7              | 7             | 18            | 4             | 6             |
| No. of haplotypes                            | 3              | 3             | 6             | 3             | 2             |
| No. of polymorphic sites                     | 11             | 11            | 13            | 10            | 10            |
| Gene diversity                               | 0.714 ± 0.127  | 0.762 ± 0.115 | 0.726 ± 0.094 | 0.833 ± 0.222 | 0.333 ± 0.215 |
| Mean no. of pairwise differences             | 6.429 ± 3.465  | 6.476 ± 3.489 | 4.961 ± 2.531 | 5.333 ± 3.252 | 3.333 ± 1.986 |
| Nucleotide diversity                         | 0.021 ± 0.013  | 0.027 ± 0.013 | 0.016 ± 0.009 | 0.017 ± 0.012 | 0.011 ± 0.007 |

Gene diversity, number of segregating sites, and nucleotide diversity for each time interval were calculated with Arlequin v. 2.000 (Jaarola and Tegelström 1996; Schneider et al. 2000).

DOI: 10.1371/journal.pbio.0020290.t001

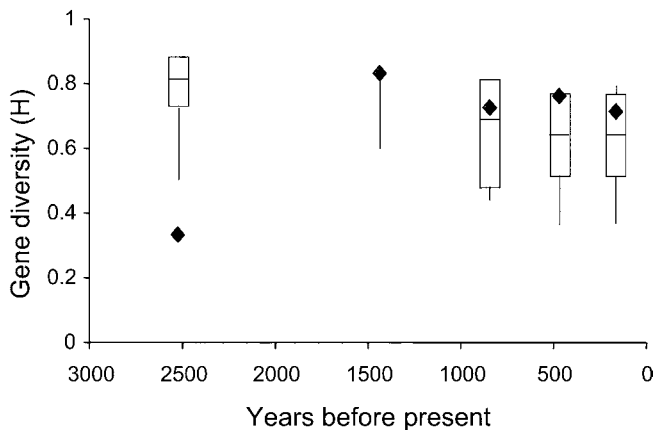

**Figure 4.** Expected and Observed Gene Diversity of *M. montanus*

Boxes represent the 95th, 50th, and fifth percentiles for expected gene diversity of *M. montanus* given estimates of  $N_{e-mm\_ecol}$  at 2,525, 1,438, 845, 470, and 166 ybp and the associated sample sizes ( $n = 7, 7, 18, 4,$  and  $6$ ) based on the Ewens sampling distribution (assumed mutation rate = 4% per million years per bp for a 312-bp fragment). Bars represent the 95th and fifth percentiles for a sample size of 100 at the same points in time. Diamonds represent observed gene diversity from empirical genetic data. The empirical data for each time unit fall within the expected ranges of gene diversity, except those for 2,525 ybp, which are much too low for the seven samples to detect, suggesting that observed gene diversities are not limited by sample size.

DOI: 10.1371/journal.pbio.0020290.g004

given expectations from a closed population, we attempted to determine the statistical limitations of these data. Investigation of the effects of sampling for *T. talpoides* revealed that given the smaller number of base pairs (64 bp), we do not have enough statistical power to reject the null hypothesis. For every sampling time point, the Ewens distribution predicted that only one haplotype would be present in the genetic samples (unpublished data). As a result, the predicted gene diversity was zero for all time points. Because the observed gene diversity for *T. talpoides* was higher than predicted we also simulated five combinations of mutation rate and abundance, which could result in a higher predicted diversity (high mutation rate, high abundance; high mutation rate, moderate abundance; high mutation rate, low abundance; moderate mutation rate, high abundance; low mutation rate, high abundance) for 166 ybp ( $n = 34$ ). Results for all five combinations predicted presence of a single haplotype. Since we do not have adequate statistical power given the genetic data for *T. talpoides*, we did not conduct significance tests for this species. However, the observed values of gene diversity are not unexpected from dynamics within a closed population.

#### Significance of Changes in Gene Diversity in *M. montanus*

For eight of the nine combinations of mutation rate and effective size, we could reject the null hypothesis (closed population, no selection, changes in abundance inferred through fossil abundance) based on the observed change in *M. montanus* gene diversity throughout the entire time series (2,525 to 166 ybp) (Table 2). The expected distribution of change in gene diversity given the null hypothesis and based on moderate *M. montanus* densities and moderate mutation rate is shown in Figure 5 (Table 2 shows all combinations), along with the observed change. However, given the observed

change in gene diversity specifically between 2,525 and 845 ybp, we were able to reject the null hypothesis for all nine combinations of mutation rate and effective size. These results suggest that *M. montanus* was not acting as a closed population during this period of time. Because the serial coalescent model presented here does not discriminate between selection and migration, either of these processes could have caused the observed change in gene diversity.

Our results may depend on our assumptions of equilibrium population size prior to 2,525 ybp. We investigated sensitivity to this assumption by modeling a population bottleneck in *M. montanus* prior to 2,525 ybp. We modeled population reduction to 104,577 ( $0.75 \times N_{e-mm\_ecol2525ybp}$ ), 69,718 ( $0.5 \times N_{e-mm\_ecol2525ybp}$ ), and 34,859 ( $0.25 \times N_{e-mm\_ecol2525ybp}$ ) prior to 2,525 ybp. For a 75% bottleneck prior to 2,525 ybp, we were no longer able to reject the null hypothesis of a closed population. These results indicate that an extreme bottleneck where population size was reduced to 75% or more might result in the observed change in gene diversity. Our simulations reveal that unless an extreme bottleneck happened prior to 2,525 ybp, we can be confident that the observed change in gene diversity is not likely to be from events that occurred immediately prior to our historic data, and thus is due to migration or selection.

Coalescent simulations used to investigate the significance of the observed gene diversity value for the modern samples demonstrated that the null hypothesis of past population size change could be rejected at only two of the nine mutation rate and density combinations. These results reveal that given data from only the modern samples, it was not possible to reject the null hypothesis of past population size change in *M. montanus*. Historic genetic data allow us to discriminate between population processes over millennia much better than do modern data alone.

#### Other Evidence for Migration

Independent lines of genetic and demographic evidence also point to the influence of gene flow in *M. montanus* populations. Estimates of  $\beta$ -diversity (used here to measure haplotypic turnover) from haplotypic data reveal that turnover was highest between 2,525 and 845 ybp ( $\beta_{2525-845ybp} = 3$ ;  $\beta_{845-166ybp} = 1.5$ ; and  $\beta_{2525-166ybp} = 1.5$ ). Closer examination of the haplotypic distributions demonstrates that five novel haplotypes appeared by 845 ybp, three of which are  $\geq 3.2\%$  different from the most common haplogroup (*A*) (Figure 3A) at 2,525 ybp, further implicating gene flow between 2,525 and 845 ybp.

#### Discussion

Our results demonstrate different genetic responses by two species of small mammals to changes in population size driven by climatic change. Fossil abundance data reveal population decline for both *T. talpoides* and *M. montanus* between 1,438 and 470 ybp, a period spanning the Medieval Warm Period (Hadly 1996). For *T. talpoides*, the genetic response is directly related to changes in population size: Decrease in population size results in lowered gene diversity. *M. montanus* demonstrates the opposite relationship: A decrease in population size (between 1,438 and 166 ybp) results in an increase in gene diversity. We attempted to statistically validate our results by the use of serial coalescent

**Table 2.** The Average (over 1,000 Simulations) Expected Change in Gene Diversity for Nine Combinations of Density and Mutation Rate for *M. montanus* between 2,525 and 166 ybp

| Mutation Rate | Density       |                 |                |
|---------------|---------------|-----------------|----------------|
|               | High          | Moderate        | Low            |
| High          | 0.038 (0.007) | 0.0067 (0.008)  | -0.035 (0.019) |
| Moderate      | 0.010 (0.016) | -0.0485 (0.015) | 0.0993 (0.148) |
| Low           | -0.079 (0.00) | -0.0957 (0.024) | -0.129 (0.023) |

Significance values for observed change are in parentheses. All combinations other than moderate mutation rate and low density allow rejection of the null hypothesis of a closed population.

DOI: 10.1371/journal.pbio.0020290.t002

simulations to demonstrate that the change in gene diversity of *M. montanus* between 2,525 and 845 ybp is significantly different from that expected based on the decrease in ecological estimates of population size. Taken together, these results indicate a departure from conditions of equilibrium (closed population without selection) for *M. montanus*. Our results have the following possible explanations: (1) the sampling area for fossils changed, (2) the local population size expanded, (3) selection occurred, and/or (4) gene flow occurred.

### Selection versus Gene Flow

Results from all three of our analyses suggest that gene flow could be responsible for the patterns in gene diversity observed in our empirical data. Additionally, recent results of experimental studies of density dispersal dynamics in the root vole, *Microtus oeconomus*, indicate that migration occurs most frequently in and between low-density patches (Andreassen and Ims 2001). These results indicate that density and dispersal in voles may be inversely related, a finding that is consistent with our results.

An alternative explanation is that selection is governing the observed gene diversity patterns. While cytochrome *b* may

not be under intense selection (Irwin et al. 1991), it is linked to other portions of the mitochondrial genome that may be selectively advantageous in particular environments. Using cytochrome *b* as a marker for the accumulations of adaptations elsewhere on the genome may yield information about the effects of selection on local populations through time. Further exploration is necessary to investigate and identify the presence of locally adapted mtDNA and the rates of evolutionary change necessary to produce the variation in gene diversity we have observed (e.g., Pergams et al. 2003).

### Conclusions

Here we demonstrate, using a phylogenetic approach, that it is possible to distinguish the dynamic processes that govern gene diversity over relatively short time scales (hundreds to thousands of years). We have documented environmental change, population response, genetic diversity change, and the correlations between the three. Without serial data, we would capture just a single record of these historic processes: modern genetic diversity. Although it is possible to hypothesize about historic events using modern data, phylogenetics affords a unique look into the past and the potential ability to separate cause from effect. In particular, we show that *M. montanus* has a history recording responses both within populations (fluctuations in population size, possible selection) and between populations (gene flow). Discrepancy between the ecological and genetic estimates of population size and significant changes in haplotypic diversity prior to the Medieval Warm Period implicate increased gene flow into the Lamar Cave *M. montanus* population. Additionally, the observed haplotypic turnover in the Yellowstone population during this period suggests that as abundance of *M. montanus* declined through the last 845 years, relatively more individuals carried newly introduced haplotypes.

Our results indicate that the presently observed widespread genetic variation across the geographic range in this species arose not because gene flow was equivalent through all populations through time, but because during particular time periods, certain local populations (and/or genotypes) declined while others expanded. Our data show that even with a prolonged ecological population size decline, the genetic diversity of *M. montanus* was maintained. In contrast, gene flow has not played a significant role in the recent genetic history of *T. talpoides*. This species, instead, responded more as a closed population over this time. The disparate nature of

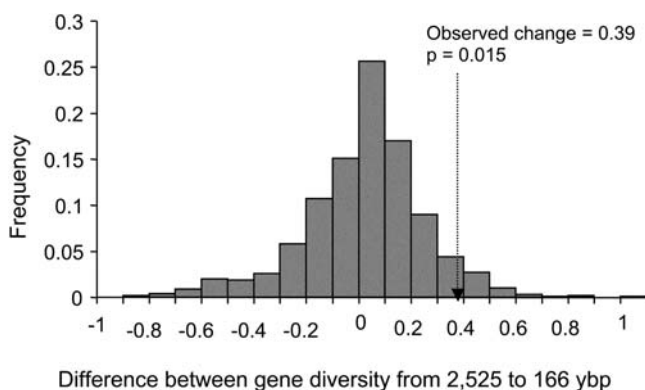

**Figure 5.** Distribution of Change in Gene Diversity for *M. montanus* between 2,525 and 166 ybp, Based on Serial Coalescent Simulations. Sampling is modeled at two points in time.  $N_{e-mm-ecol}$  estimates from Figure 2 are used to specify demographic history. Eight of the nine combinations of mutation rate and density allow us to reject the null hypothesis for a closed population (Table 2). This figure illustrates simulation results for moderate density and moderate mutation rate (4% per million years per bp). The probability of the observed change (shown by dashed arrow) is significant ( $p = 0.015$ ). DOI: 10.1371/journal.pbio.0020290.g005

population response to climatic change of these two species is likely due to differences in demographic dispersal patterns between their populations. Such differences in species demography have resulted in differential genetic response to climatic change, even when ecological response is similar. Thus, genetic response to environmental change can be viewed as “individualistic,” similar to unique adjustments of species ranges (Root et al. 2003). Life history traits such as dispersal ability contribute to the overall gene diversity of species in both space and time. If life history has such a large impact for common species, such differences will be particularly important in understanding how entire communities are affected by global change. Ultimately, knowledge from such analyses will lead to distinct, and perhaps predictable, patterns of species persistence through climatic changes, insights that will prove invaluable to future conservation of biodiversity.

## Materials and Methods

**Fossil locality.** Lamar Cave contains well-stratified, thoroughly radiocarbon-dated deposits, which display high fidelity to the local mammalian community (Hadly 1996, 1999). The most common animals from Lamar Cave are also the most common in the sagebrush grassland ecosystem in which Lamar Cave is located. Relative abundances are based on the entire data set of 10,597 specimens (except for those in Figure 1A, which uses the five most common small mammals [ $n = 8,589$ ]) and are concordant with expectations of taxonomic diversity in montane mammal communities of western North America (Hadly and Maurer 2001). The cumulative number of bones in Lamar Cave is correlated with time, demonstrating a constant “rain” of bones from the past to the present environment ( $R^2 = 0.86$ ; unpublished data).

**Age assignment.** The historical *Microtus* samples encompass 15 of 16 radiocarbon-dated stratigraphic levels from Lamar Cave (Hadly 1996), with a maximum radiocarbon age of  $2,860 \pm 70$  ybp (CAMS-20356). Data from the stratigraphic levels were pooled into five discrete intervals for Lamar Cave representing the last 3,000 years (Hadly 1996). Interval boundaries were based on the stratigraphic pattern of deposition observed during excavation as well as a detailed radiocarbon chronology. Thus each interval represents a biologically significant packet of specimens. Age for each interval was assigned as the midpoint of the span of the calibrated radiocarbon ages (Hadly 1996).

**Ecological estimates of population size.** Absolute population sizes in both ancient and modern communities are difficult to estimate. However, relative abundance changes of the small mammals are consistent with the climatically caused changes in habitats and the habitat preferences documented by modern trapping data proximate to the fossil site (Hadly 1999, Figure 1A). By calculating the area preferred by *M. montanus* and *T. talpoides* using the geographical information system, we were able to standardize the relationship between taphonomy and population size in these species. This was possible because the collection radius of the fossils from Lamar Cave has been documented to be less than 7 km by using strontium isotopes (Porder et al. 2003). We then estimated ecological effective population size from relative abundance through time, current population density, and the current area of preferred habitat in the collection radius. The current area of *M. montanus* habitat within the 7-km radius totals 1,992 ha; for *T. talpoides* it totals 971 ha. High, moderate, and low densities for *T. talpoides* (Verts and Carraway 1999) and *M. montanus* (Sullivan et al. 2003) were used in association with the corresponding areas of occupied habitat to estimate current census size. Because the rate of accumulation of bones through time is constant, the current census size was indexed against the percentage of *Microtus* bones from the uppermost level of Lamar Cave and used to calculate historic census sizes through time.

In order to compare ecological estimates of effective population size to genetic estimates, we estimated mitochondrial effective population size assuming that  $N_e/N_{\text{census}} = 0.5$  (Storz et al. 2002; estimates from small mammals), and given that mitochondrial effective size is  $N_e/4$ . Our estimates of  $N_e$  were based entirely on relative fossil abundance and current ecological data and assume a

mitochondrial effective size; thus we labelled them  $N_{e\text{-mt\_ecol}}$  (*T. talpoides*) and  $N_{e\text{-mm\_ecol}}$  (*M. montanus*).

**Genetic data from *M. montanus*.** From the fossil material, we used the upper first molar (from only one side of the jaw per level) to avoid sampling the same individual multiple times. Some *Microtus* species are cryptic with respect to these teeth. Genetic diagnosis indicated that these 78 fossil samples are derived from multiple arvicoline species, with a total of 47 *M. montanus* specimens (see Table 1). Fossil samples (*Microtus* molariform teeth) ranged from 3.5 to 15.3 mg (average, 8.8 mg). We used two previously described extraction methods on the fossil teeth (Hadly et al. 2003). We obtained a 312-bp fragment of mitochondrial cytochrome *b* from ancient samples ( $n = 47$ ) using the following primers: forward primers (5′–3′), CLETH 37 TAY AAY ATA ATY GAA ACH TGA A (5′ end of *cyt b* 319 equals *Mus musculus* 14458), CLETH 37L AYG GMT CTT AYA ACA TAA TCG AAA CAT G (*cyt b* 311, *M. musculus* 14450), MMONT 1 CAG TAA TTA CAA AYC TWC TAT CA (*cyt b* 452, *M. musculus* 14591), and MMONT 3 AGT GAA TCT GAG GGG GCT TCT CAG TAG A (*cyt b* 485, *M. musculus* 14621); reverse primers (5′–3′), ARVIC 08 CAG ATY CAY TCY ACT AGT GTT G (*cyt b* 473, *M. musculus* 14612), ARVIC 08L CTC AGA TTC ACT CTA CTA GTG TTG TG (*cyt b* 471, *M. musculus* 14610), MMONT 4 TTR TTT GAT CCT GTT TCG TGT AGG AAT A (*cyt b* 595, *M. musculus* 14631), and MMONT 2L TTG ACT GTG TAG TAA GGG TGA AAT GGG A (*cyt b* 653, *M. musculus* 14792). Attempts were made to amplify the region in two overlapping fragments using CLETH37/ARVIC 08, CLETH37L/ARVIC 08L, and MMONT 1/MMONT 2L. However, the low rate of success for MMONT 1/MMONT 2L (40%) in the fossil samples necessitated the breaking of the second fragment into two overlapping fragments using MMONT 1/MMONT 4 and MMONT 3/MMONT 2L.

Ancient DNA samples were run on an ABI PRISM 310 Genetic Analyzer in the post-PCR lab, and modern DNA samples were run on an ABI PRISM 377 Sequencer in a separate sequencing facility (Protein and Nucleotide Facility, Beckman Center, Palo Alto, California, United States). Fragments were sequenced in both directions, primer regions were overlapped, and sequences with any ambiguous sites were rerun until completely resolved in order to provide additional corroboration and eliminate ambiguity.

We adhered to strict extraction and amplification protocols (Hadly et al. 2003). The protocol further included (1) independent sequence corroboration of two samples (J. Mountain lab, Anthropological Sciences, Stanford University), (2) processing of modern samples using personnel and reagents in another lab (D. Petrov lab, Biological Sciences, Stanford University) all physically separate from the aDNA facility, (3) monitoring contamination with several extraction and PCR controls, (4) primer design specific to arvicoline species, and (5) no prior or concurrent history of working with murid species in any of the DNA facilities involved.

Modern (spatial) genetic sampling was obtained from a variety of sources including modern skins, modern liver tissue, museum skins, and teeth derived from modern raptor pellets. DNA was successfully extracted from 16 modern skins ( $n = 13$  *M. montanus*;  $n = 3$  other *Microtus*) and 12 teeth ( $n = 5$  *M. montanus*;  $n = 7$  other *Microtus*) from the vicinity (within 10 km) of the fossil site. In addition, DNA was successfully extracted from 51 modern specimens (liver tissue and museum skins) collected within a 400-km radius of Lamar Cave. Of these 51 samples, 22 were derived from museum skins ( $n = 21$  *M. montanus*;  $n = 1$  *M. longicaudus*) and 29 from liver tissue ( $n = 9$  *M. montanus*;  $n = 18$  other *Microtus*) of specimens trapped in the field. We followed the animal tissue protocol using the Qiagen Dneasy Tissue Kit (Qiagen, Valencia, California, United States) on 6.5 mg of liver samples and 7.5 mg of tooth samples ( $n = 3$ ). For museum samples, DNA was extracted from the ventral skin incision (0.5 to 10.3 mg; average, 2.7 mg). We amplified the entire cytochrome *b* gene (1,143 bp) for some modern skins ( $n = 13$ ) and liver tissue ( $n = 29$ ) with the following primers: forward primers (5′–3′), MVZ 05 CGA AGC TTG ATA TGA AAA ACC ATC GTT (*cyt b* –51, *M. musculus* 14088) and ARVIC 07 AAA GCC ACC CTC ACA CGA TT (*cyt b* 514, *M. musculus* 14653); reverse primers (5′–3′) MICRO 06 GGA TTA TTT GAT CCT GTT TCG T (*cyt b* 602, *M. musculus* 14741) and VOLE 14 TTT CAT TAC TGG TTT ACA AGA C (*cyt b* 1170, *M. musculus* 15309).

DNA was extracted from a total of 81 modern *Microtus* samples, and 79 of those yielded successful amplification. Of these 79 samples, 48 were positively identified as *M. montanus*. Of the *M. montanus* samples, 41 specimens were successfully haplotyped. Sequences have been deposited in GenBank (see Supporting Information).

**Genetic data from *T. talpoides*.** We have built upon the previously published *T. talpoides* data set (Hadly et al. 1998) with additional temporal sampling ( $n = 3$ ) (see Table 1). *T. talpoides* from Lamar Cave demonstrated remarkable continuity in gene diversity through time,



with only three haplotypes present, all of which differ from each other by one synonymous third-position mutation. The majority of the fossil *T. talpoides* specimens are from haplotype A (83%), which is not found elsewhere in a 400-km radius around Lamar Cave. This constancy in the genetic lineage of *T. talpoides* within a single locality persists in spite of climatic changes and concurrent significant population and body size changes (Hadly et al. 1998).

**Data analysis.** Arlequin v. 2.000 (Jaarola and Tegelström 1996; Schneider et al. 2000) was used to calculate gene diversity, number of segregating sites, and nucleotide diversity for each time interval (see Figure 1B and Table 1). Additionally, genetic data were used to estimate the mitochondrial effective population size ( $N_e$ ) for all points in the past. Assuming a neutral model of molecular evolution,  $\theta_S$  (where  $S$  is the number of segregating sites;  $\theta_S = 2N_e\mu$ , where  $\mu$  is the mutation rate for the complete sequence per generation) was used to estimate  $N_e$ .  $\theta_S$  was preferred over other estimators of  $\theta$  since  $\theta_H$  is biased for single locus estimates,  $\theta_k$  does not incorporate sequence information, and  $\theta_\pi$  has higher variance. These estimates are determined entirely from genetic data; thus we label them  $N_{e-tl\_gen}$  (*T. talpoides*) and  $N_{e-mm\_gen}$  (*M. montanus*). We assumed a range of  $\mu$  (2% [low], 4% [moderate], or 10% [high] per million years per bp) (Table 2). Additionally, to estimate haplotype turnover we calculated  $\beta$ -diversity (used traditionally in ecology to measure species turnover) using Cody's index (Cody 1968). For  $\beta$ -diversity each haplotype was treated as a "species."

**Effects of sampling.** Given the general limitations of obtaining aDNA sequence data, sample sizes will always present challenges to ancient population genetic studies. To investigate whether our samples are adequate for addressing temporal gene diversity in both species, we used a neutral population model to evaluate expected diversity. Ewens (1972) derived expressions for the sampling distribution characterizing a closed population of size  $N$ , a gene with mutation rate  $\mu$ , and an infinite alleles model given a sample size  $n$ . Here we use the Ewens distribution to ascertain the ability of our data to detect variation in values of gene diversity. In addition, this distribution allows us to (1) predict the distribution of expected gene diversity at each point in time (independently) given estimates of  $N_{e\_ecob}$  a moderate mutation rate of 4% per million years, typed sequence length (312 bp for *M. montanus* and 63 bp for *T. talpoides*), and sample size (*M. montanus*:  $n_{166ybp} = 7$ ,  $n_{470ybp} = 7$ ,  $n_{845ybp} = 18$ ,  $n_{1438ybp} = 4$ , and  $n_{2525ybp} = 6$ ; *T. talpoides*:  $n_{166ybp} = 34$ ,  $n_{470ybp} = 5$ ,  $n_{845ybp} = 29$ ,  $n_{1438ybp} = 4$ , and  $n_{2525ybp} = 11$ ) and (2) predict change in the expected gene diversity distribution for a large sample size of 100. A modified version of MONTE CARLO (Slatkin 1994, 1996) was used to generate possible allele configurations for a given set of parameters ( $\theta$ ,  $K$ , and  $n$ ), and gene diversity was calculated for each configuration. Simulations were repeated 1,000 times for each sampling time point, resulting in the 95% confidence intervals for the distribution of predicted gene diversities given a closed, selectively neutral population through time.

**Serial coalescent simulations.** We assessed the significance of the observed changes in gene diversity between time points using simulations. The serial coalescent was used as a framework to model *M. montanus* evolution during the past 2,525 years. Simulations were repeated 1,000 times to generate genetic data and changes in gene diversity for the null hypothesis. The significance of the observed changes was then inferred by comparing it to the generated null values (we thus used a Monte Carlo significance test). Estimates of  $N_{e\_ecob}$  were used to set up a null hypothesis specifying population size change through time in a closed population. We assumed that past changes in population size between intervals were due to exponential growth or decline. The effective population size at two time points

and the time between the points was used to calculate a growth rate. The estimated growth rates were  $r_{1438-2525ybp} = -0.000178$ ,  $r_{845-1438ybp} = 0.000732$ ,  $r_{470-845ybp} = 0.0004385$ , and  $r_{166-470ybp} = 0.0003212$ . The null hypothesis thus corresponds to effective population sizes at particular points in the past and exponential growth or decline between those intervals, and represents an ecologically realistic description of the past 2,525 years. We assumed a constant population size prior to 2,525 ybp, as we have no data before this point in time. The coalescent program SIMCOAL (Excoffier et al. 2000) was modified to incorporate temporal sampling (also known as heterochronous sampling):  $n_1$  samples modeled back in time, with  $n_2$  samples added to the genealogy at a time point  $t_1$  generations in the past. The serial coalescent (Rodrigo and Felsenstein 1999; Drummond et al. 2003) has been used to estimate parameters such as  $\mu$  for HIV and ancient mtDNA (most recently using an MCMC approach; Drummond et al. 2002; Lambert et al. 2002). In this paper, we present what we believe to be its first application as a simulation tool used to predict change in gene diversity for the null model of population size change described above. Running the model 1,000 times provides the expected distribution for change in gene diversity. Using  $N_{e-mm\_ecol}$  estimates based on high-, moderate-, and low-density estimates for *M. montanus* (186, 126, and 60 voles/ha; Sullivan et al. 2003) and a high, moderate, and low mutation rate ( $\mu = 10\%$ ,  $4\%$ , and  $2\%$  per million years per bp; sequence length = 312 bp; finite sites mutation model, no rate heterogeneity), we investigated the significance of observed changes in gene diversity at all nine parameter combinations over the entire time span (2,525 to 166 ybp) and between 2,525 and 845 ybp (spanning the Medieval Warm Period).

Additionally, we also investigated the relevance of temporal data to our ability to reject the null hypothesis. Significance tests were repeated assuming the observed data were from only the most recent genetic samples. Again, simulations were repeated for all nine combinations of mutation rate and density estimates.

## Supporting Information

### Accession Numbers

Sequences for the successfully haplotyped *M. montanus* specimens described in Materials and Methods have been deposited in GenBank under accession numbers AY660606 to AY660629.

## Acknowledgments

We thank J. Zinck for her assistance in the lab, C. Roseman for his initial work with effective size estimates, and J. Mountain and D. Petrov for use of their molecular facilities. We particularly appreciate the comments and discussion from T. Oliver. Several comments were received earlier versions of this manuscript and we thank D. Ackerly, A. Barnosky, P. Ehrlich, M. Feldman, J. Mountain, S. Palumbi, J. Patton, A. Paytan, D. Petrov, T. Root, S. Schneider, P. Vitousek, members of the Hadly lab, Jay Storz, and two anonymous reviewers' suggestions. Financial support was provided by National Science Foundation award DEB #0108541 to EAH.

**Conflicts of interest.** The authors have declared that no conflicts of interest exist.

**Author contributions.** EAH conceived and designed the experiments. YLC, MV, KOK, PAS, and CJC performed the experiments. EAH, UR, YLC, and MV analyzed the data. EAH and UR contributed reagents/materials/analysis tools. EAH, UR, YLC, MV, and KOK wrote the paper. ■

## References

- Andressen HP, Ims RA (2001) Dispersal in patchy vole populations: Role of patch configuration, density dependence, and demography. *Ecology* 82: 2911–2926.
- Avise JC (2000) *Phylogeography: The history and formation of species*. Cambridge: Harvard University Press. 447 p.
- Bjørnstad ON, Grenfell BT (2001) Noisy clockwork: Time series analysis of population fluctuation in animals. *Science* 293: 638–643.
- Clement M, Posada D, Crandall K (2000) TCS: A computer program to estimate gene genealogies. *Mol Ecol* 9: 1657–1660.
- Cody ML (1968) On methods of resource division in grassland bird communities. *Am Nat* 102: 107–147.
- Conroy CJ, Cook JA (1999) MtDNA evidence for repeated pulses of speciation within arvicoline and murid rodents. *J Mammal Evol* 6: 221–245.
- Conroy CJ, Cook JA (2000) Phylogeography of *Microtus longicaudus*, a postglacial colonizer. *Mol Ecol* 9: 165–175.

- Consuegra S, García de Leániz C, Serdio A, González Morales M, Straus LG (2002) Mitochondrial DNA variation in Pleistocene and modern Atlantic salmon from the Iberian glacial refugium. *Mol Ecol* 11: 2037–2048.
- Drummond AJ, Nicholls GK, Rodrigo AG, Solomon W (2002) Estimating mutation parameters, population history and genealogy simultaneously from temporally spaced sequence data. *Genetics* 161: 1307–1320.
- Drummond AJ, Pybus OG, Rambaut A, Forsberg R, Rodrigo AG (2003) Measurably evolving populations. *Trends Ecol Evol* 18: 481–488.
- Ewens WJ (1972) Sampling theory of selectively neutral alleles. *Theor Popul Biol* 3: 87–112.
- Excoffier L, Novembre J, Schneider S (2000) SIMCOAL: A general coalescent program for the simulation of molecular data in interconnected populations with arbitrary demography. *J Hered* 91: 506–509.
- Frankham R (1996) Relationship of genetic variation to population size in wildlife. *Conserv Biol* 10: 1500–1508.

- Hadly EA (1996) Influence of late-Holocene climate on northern Rocky Mountain mammals. *Quaternary Res* 46: 298–310.
- Hadly EA (1997) Evolutionary and ecological response of pocket gophers (*Thomomys talpoides*) to late-Holocene climatic change. *Biol J Linn Soc Lond* 60: 277–296.
- Hadly EA (1999) Fidelity of terrestrial vertebrate fossils to a modern ecosystem. *Palaeogeogr Palaeoclimatol Palaeoecol* 149: 389–409.
- Hadly EA, Maurer BA (2001) Spatial and temporal patterns of species diversity in montane mammal communities of western North America. *Evol Ecol Res* 3: 477–486.
- Hadly EA, Kohn MH, Leonard JA, Wayne RK (1998) A genetic record of population isolation in pocket gophers during Holocene climatic change. *Proc Natl Acad Sci U S A* 95: 6893–6896.
- Hadly EA, van Tuinen M, Chan Y, Heiman K (2003) Ancient DNA evidence of prolonged population persistence with negligible genetic diversity in an endemic tuco-tuco (*Ctenomys sociabilis*). *J Mammal* 84: 403–417.
- Hofreiter M, Capelli MC, Krings M, Waits L, Conard N, et al. (2002) Ancient DNA analyses reveal high mitochondrial DNA sequence diversity and parallel morphological evolution of late Pleistocene cave bears. *Mol Biol Evol* 19: 1244–1250.
- Irwin DM, Kocher TD, Wilson AC (1991) Evolution of the cytochrome-*b* gene of mammals. *J Mol Evol* 32: 128–144.
- Jaarola M, Searle JB (2002) Phylogeography of field voles (*Microtus agrestis*) in Eurasia inferred from mitochondrial DNA sequences. *Mol Ecol* 11: 2613–2621.
- Jaarola M, Tegelström H (1996) Mitochondrial DNA variation in the field vole (*Microtus agrestis*): Regional population structure and colonization history. *Evolution* 50: 2073–2085.
- Jenkins HO (1948) A population study of the meadow mice (*Microtus*) in three Sierra Nevada meadows. *Proc Calif Acad Sci* 26: 43–67.
- Kalinowski ST, Waples RS (2002) Relationship of effective to census size in fluctuating populations. *Conserv Biol* 16: 129–136.
- Lambert DM, Ritchie PA, Millar CD, Holland B, Drummond AJ, et al. (2002) Rates of evolution in ancient DNA from Adélie penguins. *Science* 295: 2270–2273.
- Leonard JA, Wayne RK, Cooper A (2000) Population genetics of ice age brown bears. *Proc Natl Acad Sci U S A* 97: 1651–1654.
- Lessa EP, Cook JA, Patton JL (2003) Genetic footprints of demographic expansion in North America, but not Amazonia, during the Late Quaternary. *Proc Natl Acad Sci U S A* 100: 10331–10334.
- Lidicker WZ (1985) Dispersal. In: Tamarin RH, editor. *Biology of the new world Microtus*: Special Publication no. 8. Lawrence, Kansas: American Society of Mammalogists. pp. 420–454.
- Moritz C, Dowling TE, Brown WM (1987) Evolution of animal mitochondrial DNA: Relevance for population biology and systematics. *Annu Rev Ecol Syst* 18: 269–292.
- Orlando L, Bonjean D, Bocherens H, Thenot A, Argant A, et al. (2002) Ancient DNA and the population genetics of cave bears (*Ursus spelaeus*) through space and time. *Mol Biol Evol* 19: 1920–1933.
- Paxinos EE, James HF, Olson SL, Ballou JD, Leonard JA, et al. (2002) Prehistoric decline of genetic diversity in the nene. *Science* 296: 1827–1827.
- Pergams ORW, Barnes WM, Nyberg D (2003) Rapid change in mouse mitochondrial DNA. *Nature* 423: 397.
- Plante Y, Boag PT, White BN (1989) Microgeographic variation in mitochondrial-DNA of meadow voles (*Microtus pennsylvanicus*) in relation to population density. *Evolution* 43: 1522–1537.
- Porder SJ, Paytan A, Hadly EA (2003) Mapping the origin of faunal assemblages using strontium isotopes. *Paleobiology* 29: 196–203.
- Rodrigo AG, Felsenstein J (1999) Coalescent approaches to HIV-1 population genetics. In: Crandall KA, editor. *The evolution of HIV*. Baltimore: Johns Hopkins University Press. pp. 233–272.
- Root TL, Price JT, Hall KR, Schneider SH, Rosenzweig C, et al. (2003) Fingerprints of global warming on animals and plants. *Nature* 421: 57–60.
- Schneider S, Roessli D, Excoffier L (2000) Arlequin: A software for population genetics data analysis. Version 2.000. Geneva: University of Geneva.
- Slatkin M (1994) An exact test for neutrality based on the Ewens sampling distribution. *Genet Res* 64: 71–74.
- Slatkin M (1996) A correction to the exact test based on the Ewens sampling distribution. *Genet Res* 68: 259–260.
- Soon W, Baliunas S (2003) Proxy climatic and environmental changes of the past 1,000 years. *Climate Res* 23: 89–110.
- Storz JF, Beaumont MA (2002) Testing for genetic evidence of population expansion and contraction: An empirical analysis of microsatellite DNA variation using a hierarchical Bayesian model. *Evolution* 56: 154–166.
- Storz JF, Ramakrishnan U, Alberts SC (2002) Genetic effective size of a wild primate population: Influence of current and historical demography. *Evolution* 56: 817–829.
- Sullivan TP, Sullivan DS, Hogue EJ (2003) Demography of montane voles in old field and orchard habitats in southern British Columbia. *Northwest Sci* 77: 228–236.
- Verts BJ, Carraway LN (1999) *Thomomys talpoides*. *Mammal Spec* 618: 1–11.
- Yang Z, Yoder AD (1999) Estimation of the transition/transversion rate bias and species sampling. *J Mol Evol* 48: 274–283.
